# Supplementary material for: Aedes aegypti salivary gland extract alleviates acute itching by blocking TRPA1 channels
Source: Frontiers journal article supplement (doi:10.3389/fphys.2023.1055706), 2023-06-27
Supplement: Data_Sheet_1.PDF [file Data_Sheet_1.PDF]

## Supplemental Tables

**Table 1** Summarizes the effect of *Ae. Aegypti* salivary gland extract (SGE) on the immunohistochemical staining for VCAM-1 and ICAM-1 in mouse dorsal skin i.d. injected with C48/80. The ratio between the labelled area (immunoreactivity) per total area analysed is given as stained area fraction in  $\mu\text{m}^2$ . Data are expressed as mean  $\pm$  SD (n= 4) for total and DAB-positive epidermal and dermal surface area in response to i.d. injection of Tyrode, SGE, C48/80, or C48/80 co-injected with SGE. No detection of ICAM-1 was observed in the epidermis in response to i.d. injection of test agents. The immunopositive area ( $\mu\text{m}^2$ ) was assessed by Image-Pro Plus 4.5 software. The normal distribution of VCAM-1 or ICAM-1 expression was investigated by Shapiro-Wilk test. Differences between groups were analysed by ANOVA followed by Sidak's multiple comparisons post-test, or by non-parametric statistics applying the Kruskal-Wallis test, followed by Dunn's test for multiple comparisons when required. \*P<0.05 vs. Tyrode or SGE, and #P<0.05 vs. C48/80.

| Groups       | Adhesion molecule positive area in $\text{mm}^2$ (Mean $\pm$ SD; n=4) |                  |                    |                   |                    |                |
|--------------|-----------------------------------------------------------------------|------------------|--------------------|-------------------|--------------------|----------------|
|              | VCAM-1 / Epidermis                                                    |                  | VCAM-1 / Dermis    |                   | ICAM-1 / Dermis    |                |
|              | Total area                                                            | Positive area    | Total area         | Positive area     | Total area         | Positive area  |
| Tyrode       | 21232 $\pm$ 9171                                                      | 2624 $\pm$ 1373  | 132155 $\pm$ 16425 | 8677 $\pm$ 2772   | 124640 $\pm$ 26964 | 1625 $\pm$ 863 |
| SGE          | 16547 $\pm$ 4157                                                      | 1526 $\pm$ 791   | 107418 $\pm$ 21039 | 3752 $\pm$ 1629   | 152481 $\pm$ 23532 | 2137 $\pm$ 393 |
| C48/80       | 20682 $\pm$ 4762                                                      | 4235 $\pm$ 1221* | 133855 $\pm$ 7486  | 13669 $\pm$ 2463* | 121879 $\pm$ 25932 | 2658 $\pm$ 674 |
| SGE + C48/80 | 18263 $\pm$ 4454                                                      | 2086 $\pm$ 581   | 137058 $\pm$ 9136  | 6546 $\pm$ 3741#  | 133589 $\pm$ 16787 | 1577 $\pm$ 717 |

Table 2 Evaluation of mast cell count in response to intradermal injection of C48/80 in the mouse dorsal in the absence and presence of *Ae. Aegypti* salivary gland extract (SGE). Intact, activated and total number of mast cells for each treatment were counted in an area of 100  $\mu\text{m}^2$  in 5  $\mu\text{m}$  sections from four animals. Data as absolute values and percentage are described as mean  $\pm$  SD of intact, activated/degranulated and total mast cell for n = 4 mice per group. The normal distribution of mast cell variable was investigated by Shapiro-Wilk test, and differences between groups were analysed by ANOVA followed by Sidak's multiple comparisons post-test, or by non-parametric statistics applying the Kruskal-Wallis test, followed by Dunn's test for multiple comparisons. \*P <0.05 vs Tyrode.

| Mast cell type         | Groups (Mean $\pm$ SD) |                   |                    |                  |
|------------------------|------------------------|-------------------|--------------------|------------------|
|                        | Tyrode                 | SGE               | C48/80             | SGE + C48/80     |
| Intact                 | 0.58 $\pm$ 0.10        | 0.51 $\pm$ 0.08   | 0.25 $\pm$ 0.10*   | 0.39 $\pm$ 0.14  |
| Activated/degranulated | 0.05 $\pm$ 0.02        | 0.09 $\pm$ 0.08   | 0.24 $\pm$ 0.12*   | 0.14 $\pm$ 0.04  |
| Values in (%)          | 8.80 $\pm$ 3.53        | 14.37 $\pm$ 11.45 | 48.57 $\pm$ 16.18* | 28.31 $\pm$ 8.54 |
| <b>Total</b>           | 0.63 $\pm$ 0.09        | 0.60 $\pm$ 0.14   | 0.49 $\pm$ 0.11    | 0.53 $\pm$ 0.20  |

Table 3. Effects of *Ae. Aegypti* salivary gland extract (SGE) on TRPA1 (AITC)-induced changes in  $[\text{Ca}^{2+}]$  in human embryonic kidney cells (HEK 293) expressing TRPA1. We have monitored changes in  $[\text{Ca}^{2+}]$  in TRPA1 transfected HEK 293 cells using Fura 2-AM. We then monitored oscillation of  $[\text{Ca}^{2+}]$  in the cells in response to vehicle (Tyrode) or test agents (SGE and AITC). Cell images were taken continuously during the protocol on the same cell population in 10 min intervals. The  $\text{Ca}^{2+}$  ion fluorescence was observed for 40 sec, basal fluorescence change was observed after 6 sec, and maximum fluorescence change was observed after 36 sec. Afterwards, SGE + AITC (100  $\mu\text{M}$ ) was added to the mixture at 42 sec, change in basal

fluorescence was observed after 9 sec and the maximum fluorescence was observed after 15 sec. AITC + SGE mixture was then washed with Tyrode, and AITC (100  $\mu$ M) was finally repeated, and the  $\text{Ca}^{2+}$  ion fluorescence was observed for 30 sec. Each data point in the columns represents the time interval that the change in fluorescence occurred. n=21 cells.

| <b>Intervals - Fluorescence changes in ion <math>\text{Ca}^{2+}</math></b> |      |                                 |                         |                                |                                  |
|----------------------------------------------------------------------------|------|---------------------------------|-------------------------|--------------------------------|----------------------------------|
| <b>Treatment</b>                                                           | Load | Change in basal<br>fluorescence | Maximum<br>fluorescence | $\Delta$ Basal changes<br>Load | $\Delta$ Maximum<br>fluorescence |
| SGE                                                                        | 0    | 6                               | 36                      | 6                              | 36                               |
| SGE + AITC                                                                 | 42   | 51                              | 57                      | 9                              | 15                               |
| AITC                                                                       | 108  | 111                             | 126                     | 3                              | 18                               |
